# Supplementary material for: Resistance to TST/IGRA conversion in Uganda: Heritability and Genome-Wide Association Study
Source: PubMed Central journal article supplement (PMC8652006; doi:10.1016/j.ebiom.2021.103727), 2021-12-04
Supplement: mmc3.pdf [file mmc3.pdf]

| Lead SNP   | CHR-POS     | rSNPs | r | rsnp.pval | relevance.pval | Genes/LinkingGenes    | IMF   | Score    | rval | p-value.pval | eQTL Genes                                      | eQTL points | RegulomeDB regulatory evidence                                        | Regulome points | score |
|------------|-------------|-------|---|-----------|----------------|-----------------------|-------|----------|------|--------------|-------------------------------------------------|-------------|-----------------------------------------------------------------------|-----------------|-------|
| rs5848072  | 5:8572539   | 2     | 1 | 0         | 0              | ABHD6                 | 0.07  | 2.05E-05 | 0    |              | FMR1, PAK, EPP14, ABHD6, DNASE1L1, F1NB         | 1           | strong transcription in lung, blood and immune cells                  | 1               | 4     |
| rs2813264  | 5:8572529   | 2     | 1 | 0         | 0              | TDRB1                 | 0.02  | 3.95E-06 | 1    |              |                                                 | 0           | strong transcription in lung, enhancer in blood                       | 1               | 1     |
| rs919822   | 5:15271152  | 1     | 0 | 0         | 0              | LINC01861             | 0.788 | 1.38E-06 | 1    |              | FAM144C, MFAP3                                  | 1           | enhancer in immune cells                                              | 1               | 3     |
| rs4972343  | 30:39983138 | 1     | 1 | 0         | 0              | ZEB1L1P1              | 0.068 | 1.39E-05 | 0    |              | CTBP2                                           | 1           | strong transcription in lung                                          | 1               | 3     |
| rs5848424  | 6:1953628   | 2     | 1 | 0         | 0              | KIF6                  | 0.487 | 1.45E-05 | 0    |              |                                                 | 0           | strong transcription in lung                                          | 1               | 1     |
| rs262672   | 5:17995314  | 1     | 0 | 1         | 0              | FAT2                  | 0.103 | 2.22E-05 | 0    |              | ARL10, NQF16, HEGGA, FAT2, ENF44, CTBP2, COPRN1 | 1           | strong transcription in lung, blood, immune cells                     | 1               | 3     |
| rs481806   | 5:8771558   | 6     | 1 | 0         | 0              | LINC000094, LINC00113 | 0.14  | 2.71E-06 | 1    |              |                                                 | 0           | strong transcription in lung                                          | 1               | 2     |
| rs17614811 | 2:19981899  | 3     | 1 | 0         | 0              | OSR1, LINC00954       | 0.163 | 1.83E-05 | 0    |              |                                                 | 0           | strong transcription in lung                                          | 1               | 2     |
| rs1481863  | 6:64595665  | 2     | 1 | 0         | 0              | TVX                   | 0.473 | 1.76E-05 | 0    |              | LOGS                                            | 1           |                                                                       | 0               | 3     |
| rs1746958  | 4:14419955  | 1     | 0 | 1         | 0              | TMD1L1                | 0.467 | 0.95E-06 | 0    |              |                                                 | 0           | Active TSS in lung, strong transcription in immune, enhancer in blood | 1               | 2     |
| rs1682999  | 5:11440114  | 1     | 0 | 1         | 0              | PRKAC2                | 0.297 | 1.09E-05 | 0    |              |                                                 | 0           | strong transcription in lung, blood, immune cells                     | 1               | 2     |
| rs917447   | 1:824709    | 1     | 0 | 0         | 0              | SPFH1                 | 0.793 | 1.02E-05 | 0    |              |                                                 | 1           | strong transcription in lung, blood and immune                        | 1               | 2     |
| rs1131201  | 20:44816376 | 1     | 0 | 1         | 0              | CTSD2                 | 0.443 | 1.26E-05 | 0    |              | CTBP                                            | 1           |                                                                       | 0               | 2     |
| rs10774701 | 17:6168357  | 1     | 0 | 0         | 0              | BIGLYN1               | 0.454 | 1.48E-05 | 0    |              | BIGLYN1, NEN2                                   | 1           | enhancer in immune cells                                              | 1               | 3     |
| rs1007594  | 5:11675002  | 1     | 0 | 0         | 0              | LINC00952             | 0.401 | 2.78E-05 | 0    |              |                                                 | 0           | strong transcription in lung                                          | 1               | 1     |
| rs327669   | 19:3711120  | 1     | 0 | 0         | 0              | NR3C                  | 0.121 | 2.77E-05 | 0    |              |                                                 | 0           | Active TSS in immune cells, strong transcription in blood and lung    | 1               | 1     |
| rs487806   | 11:7861554  | 1     | 0 | 0         | 0              | PURB1, ENO177         | 0.021 | 1.02E-05 | 0    |              |                                                 | 0           | strong transcription in lung and blood                                | 1               | 1     |
| rs1188069  | 2:10991511  | 1     | 0 | 0         | 0              | SHRF3                 | 0.067 | 4.11E-05 | 0    |              |                                                 | 0           | strong transcription in lung                                          | 1               | 1     |
| rs2541195  | 11:11081364 | 1     | 0 | 0         | 0              | COL4A1                | 0.267 | 4.83E-05 | 0    |              |                                                 | 0           | strong transcription in lung                                          | 1               | 1     |
| rs11889214 | 17:1214687  | 1     | 0 | 0         | 0              | PTGER1                | 0.371 | 4.42E-06 | 0    |              |                                                 | 0           |                                                                       | 0               | 4     |
| rs7043909  | 6:16190085  | 1     | 0 | 0         | 0              | SMEK3, LOC10178146    | 0.046 | 7.49E-06 | 0    |              |                                                 | 0           |                                                                       | 0               | 0     |
| rs483758   | 4:8818786   | 1     | 0 | 0         | 0              | LINC001296            | 0.261 | 4.98E-05 | 0    |              |                                                 | 0           |                                                                       | 0               | 0     |
| rs278645   | 21:19196211 | 1     | 0 | 0         | 0              | CTPDE                 | 0.078 | 2.31E-05 | 0    |              |                                                 | 0           |                                                                       | 0               | 0     |
| rs2884167  | 13:7149398  | 1     | 0 | 0         | 0              | CCNA1, HERTM          | 0.108 | 2.78E-05 | 0    |              |                                                 | 0           |                                                                       | 0               | 0     |
| rs2619549  | 1:2612447   | 1     | 0 | 0         | 0              | CNTN4                 | 0.377 | 1.03E-05 | 0    |              |                                                 | 0           |                                                                       | 0               | 0     |
| rs11111133 | 2:16119924  | 1     | 0 | 0         | 0              | RIBB1, TANK           | 0.078 | 1.61E-05 | 0    |              |                                                 | 0           |                                                                       | 0               | 0     |
| rs27694    | 5:19212626  | 1     | 0 | 0         | 0              | NR1A2, ARID3B         | 0.16  | 1.96E-05 | 0    |              |                                                 | 0           |                                                                       | 0               | 0     |
