# Supplementary material for: Resistance to TST/IGRA conversion in Uganda: Heritability and Genome-Wide Association Study
Source: PubMed Central journal article supplement (PMC8652006; doi:10.1016/j.ebiom.2021.103727), 2021-12-04
Supplement: mmc4.pdf [file mmc4.pdf]

| Type of study  | Gene/Locus                                | Phenotype                        | Population(s)                 | References                                                 | SNPs                            | Result                    | # SNPs with P<0.05 |
|----------------|-------------------------------------------|----------------------------------|-------------------------------|------------------------------------------------------------|---------------------------------|---------------------------|--------------------|
| Candidate gene | <i>ULK1</i>                               | TST positivity                   | Seattle                       | (Horne, Graustein et al. 2016, Shah, Musvosvi et al. 2017) | rs12297124 and rs7300908        | Untested                  |                    |
|                | <i>SLC6A3</i>                             | RSTR                             | Uganda                        | (Hall, Igo et al. 2015)                                    | rs409588, rs456082, rs464061    | p=0.9, Untested, Untested |                    |
|                | <i>IL10</i>                               | TST positivity                   | Ghana                         | (Thye, Browne et al. 2009)                                 | rs6703630, rs1800896, rs1800871 | Untested, 0.2, 0.31       |                    |
| Genome-wide    | 2q21-q24 ( <i>GTDC1</i> and <i>ZEB2</i> ) | RSTR (longitudinal)              | Uganda                        | (Stein, Zalwango et al. 2008) (Cobat, Gallant et al. 2009) | rs74533435                      | 1.09E-04                  | 404                |
|                | 5p13-q22                                  |                                  |                               | (Igo, Hall et al. 2018)                                    | rs62375908                      | 1.12E-04                  | 885                |
|                | 11p14 ( <i>TST1</i> )                     | TST positivity (cross-sectional) | South Africa                  | (Cobat, Gallant et al. 2009)                               | rs293983                        | 1.20E-03                  | 67                 |
|                | 5p15 ( <i>TST2</i> )                      | Reactivity (quantitative)        |                               | (Cobat, Hoal et al. 2013)                                  | rs56345976                      | 1.66E-04                  | 346                |
|                | 5q31 (including <i>IL9</i> )              | TST positivity and reactivity    | Tanzania and Uganda           | (Sobota, Stein et al. 2017)                                | rs466157                        | 6.99E-04                  | 155                |
|                | 10q26.2                                   | TST and IGRA positivity          | South Africa, France, Vietnam | (Quistretbet et al. pre-print)                             | rs17155120                      | 6.20E-01                  |                    |
